# Supplementary material
Source: publisher figshare collection journal article supplement (https://frontiersin.figshare.com/ndownloader/files/14565905)
Supplement: Supplementary file [file 14565905]

## Supplementary material for:

M.A.J. van Kelle, N. Khalil, J. Foolen, S. Loerakker and C.V.C. Bouten

Increased cell traction-induced prestress in dynamically cultured microtissues

### Determining the micropost spring constant

Spring constants of the microposts were determined using finite element analysis in Abaqus (Dassault Systèmes Simulia Corp., Providence, RI, USA, version 6.14-1). The micropost was modeled as a Neo-Hookean material with a stiffness of 1.72 MPa (Palchesko *et al*), which was fully encastred at the bottom. First, a force was applied to the row of elements just below the large cap of the micropost, which is where the microtissue is attached. Next, the in-plane displacement of the top middle part of the post was determined, which was subsequently used to calculate the micropost spring constant  $K$  [ $\text{N m}^{-1}$ ] using  $F_{post}^i = K u_{post}$ , with  $F$  the force and  $u_{post}$  the displacement. The spring constant for the posts used in this study was determined to be  $1.22 \text{ N m}^{-1}$ .

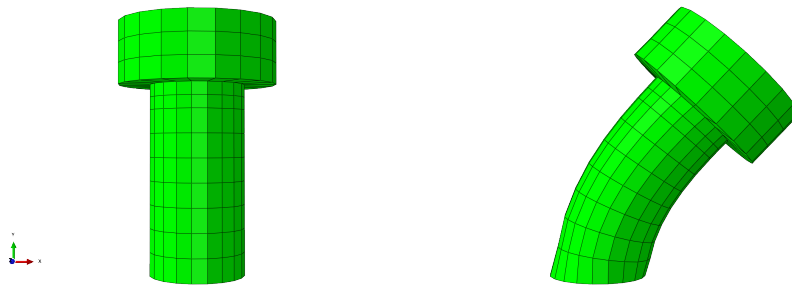

**Figure 1:** Undeformed micropost (**Left**) and micropost after application of a force to the top part of the post (**Right**)

R.N. Palchesko, L. Zhang, Y. Sun and A.W. Feinberg. Development of polydimethylsiloxane substrates with tunable elastic modulus to study cell mechanobiology in muscle and nerve. PLoS One, 2012, 7, e51499

## Microtissue Force

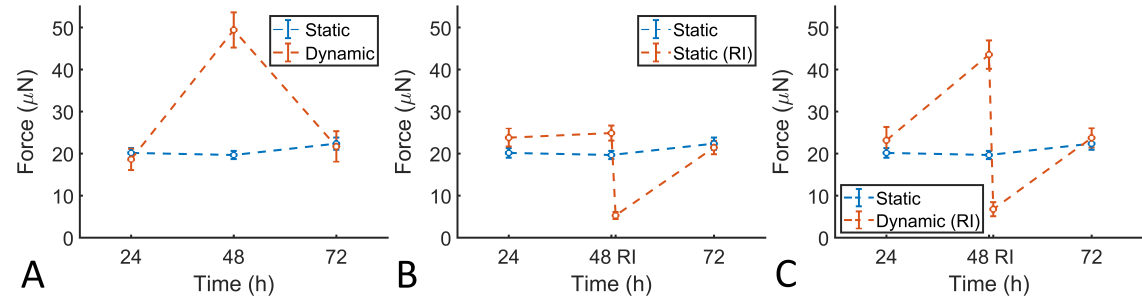

**Figure 2:** **A)** Static control group (blue) and dynamically cultured microtissues (red). After application of dynamic mechanical cues, the force increased over two-fold compared to the static controls. Removal of the mechanical load resulted in recovery of microtissue force similar to that of static controls at 72 hours. **B)** Static control group (blue) and ROCK-inhibited (RI, red) microtissues over the course of 72 hours. Initially, force magnitudes in both groups were comparable for up to 48 hours. After addition of the ROCK-inhibitor force magnitudes dropped significantly. Subsequent removal of the inhibitor yielded force recovery comparable to the control group. **C)** Static control group (blue) and dynamically stretched microtissues (red) showed increased force levels after dynamic culture. Adding the ROCK-inhibitor (RI) abated the forces almost completely, yielding comparable prestress magnitudes as ROCK-inhibited static controls in Figure B.

## Cross-sectional area

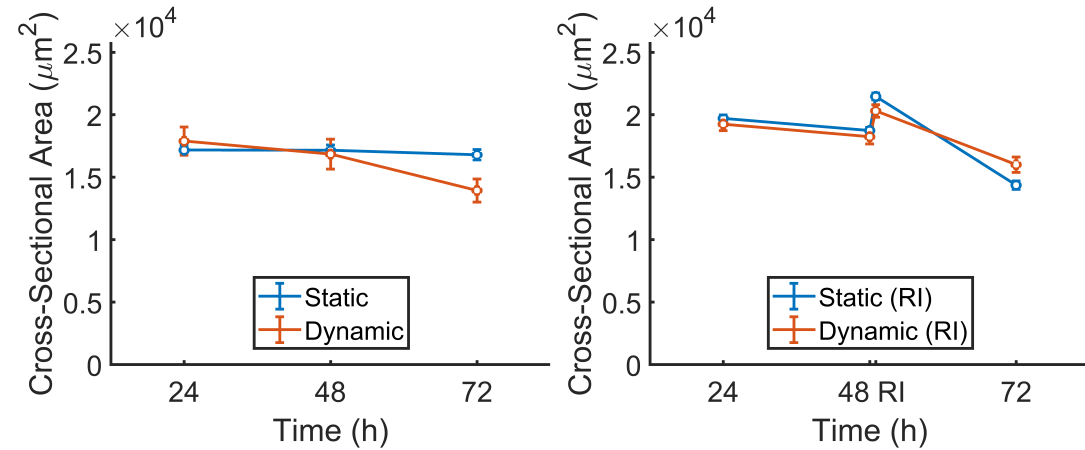

**Figure 3:** Cross-sectional area (CSA) for static and dynamically cultured microtissues (**Left**) and for the static and dynamically cultured and ROCK-inhibited (RI) microtissues (**Right**). No significant differences at the various time points could be identified.
